# Supplementary material
Source: publisher site journal article supplement (https://www.dovepress.com/article/369582)
Supplement: Supplementary file 1 [file get_supplementary_file.php]

## Supplementary Figure1 - The co relationship between E2F7 expression and the levels of MMPs and TIMPs in LUAD.

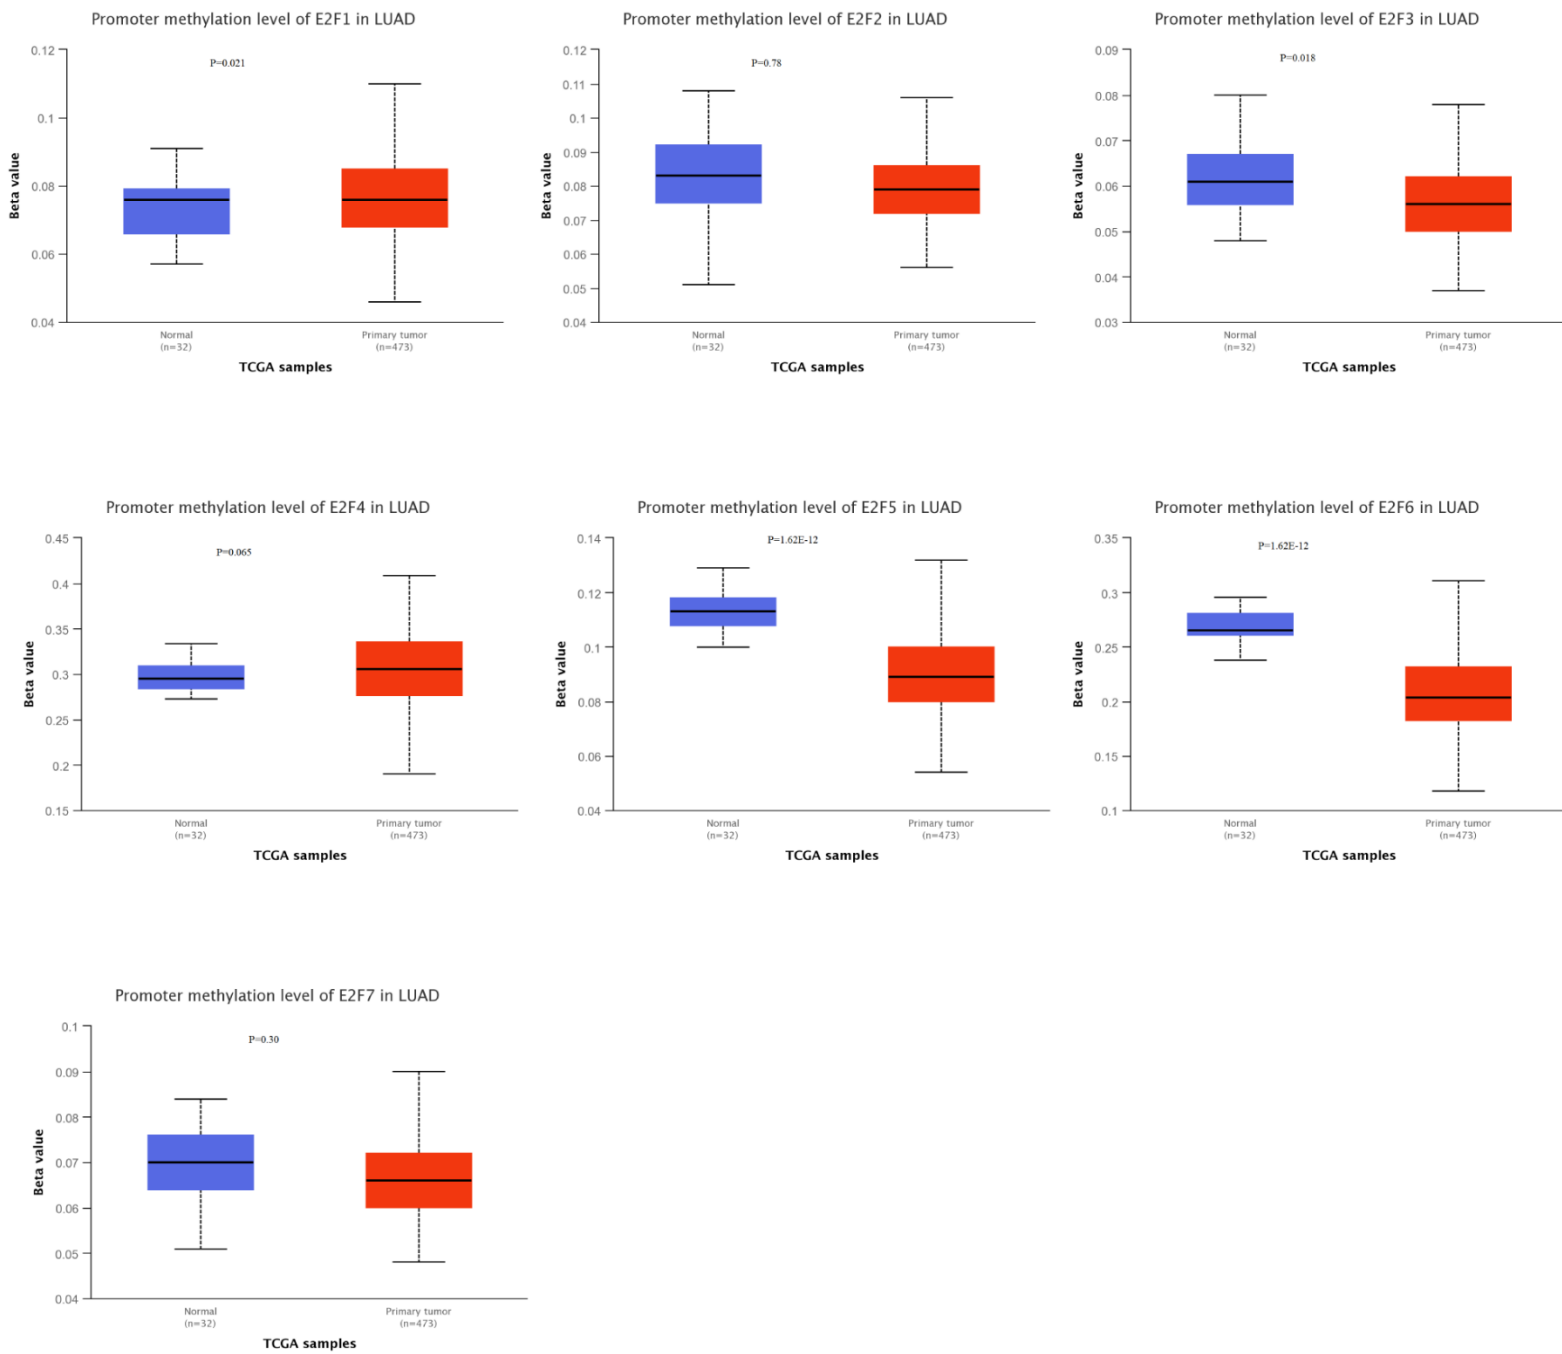

## Supplementary Figure2 - The methylation status of E2F family members in LUAD vs normal.

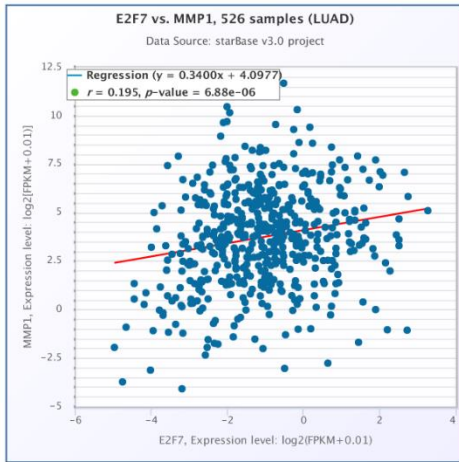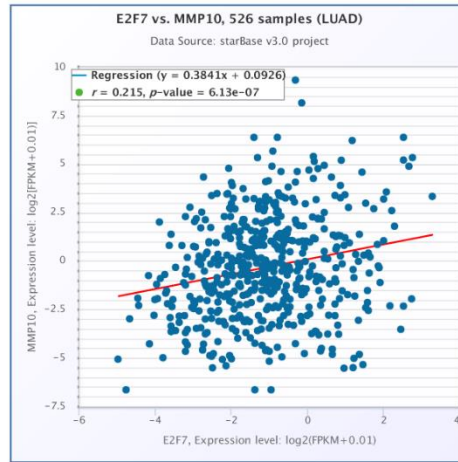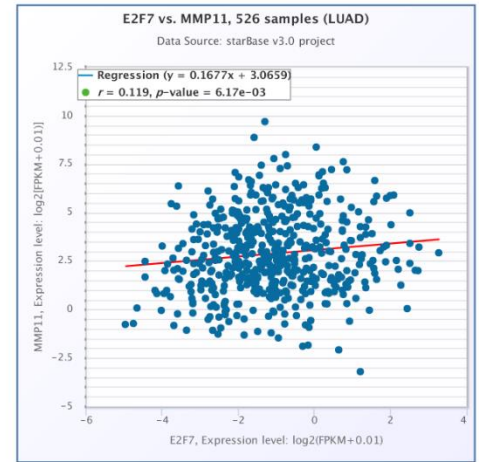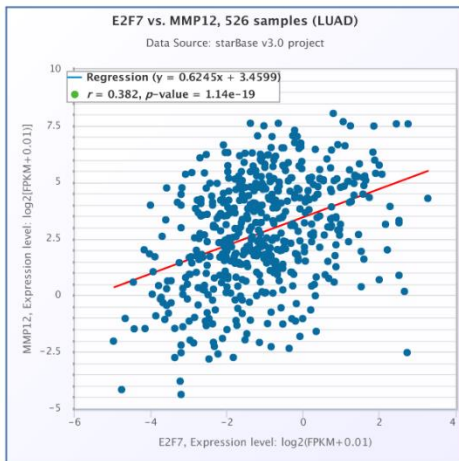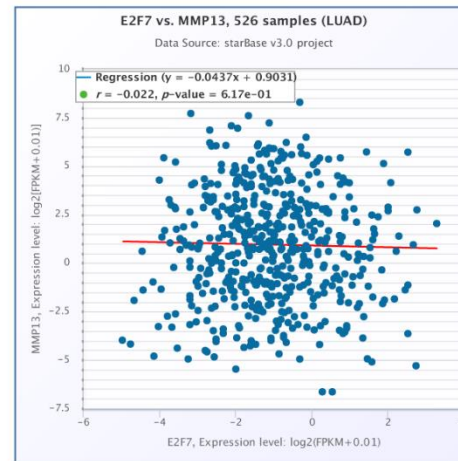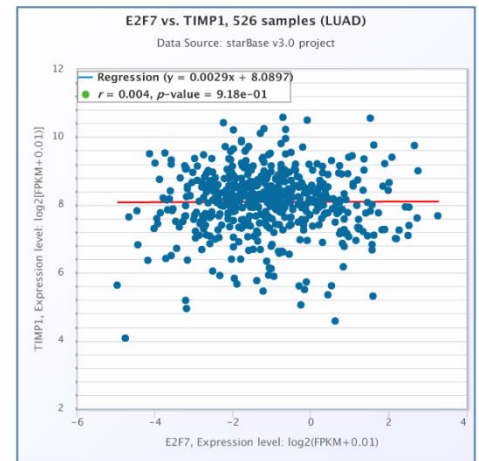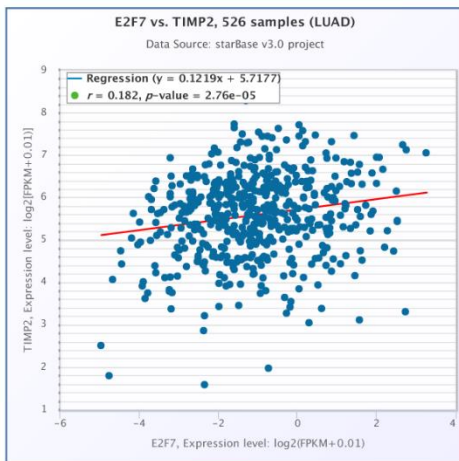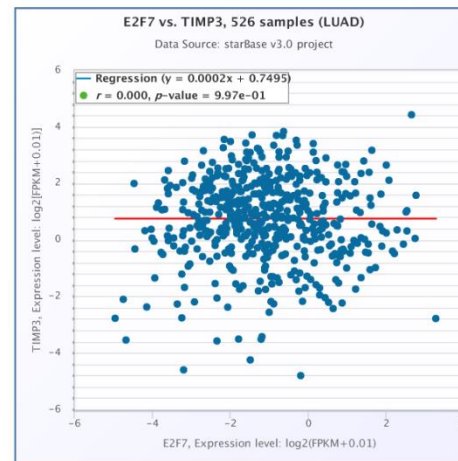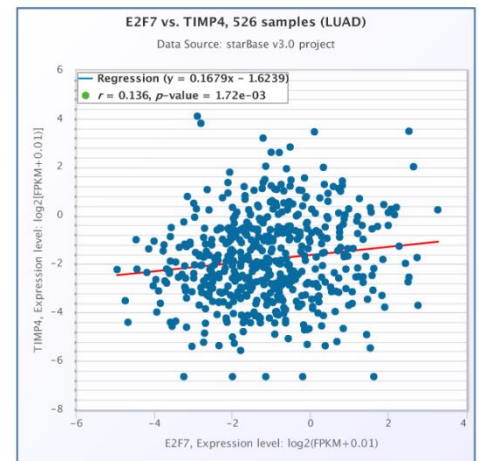

**Supplementary Figure3** - The co relationship between E2F7 expression and the levels of common chemokines and cytokines in LUAD.

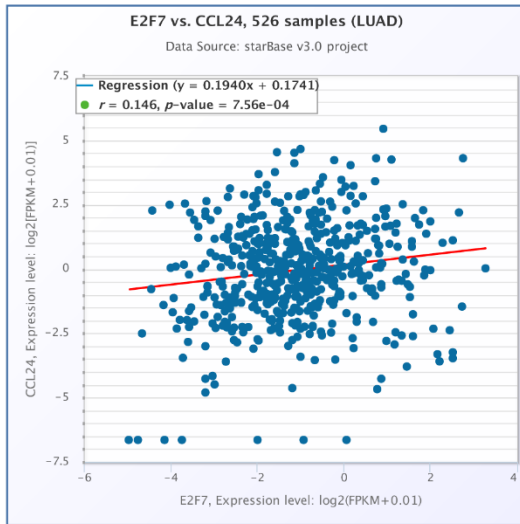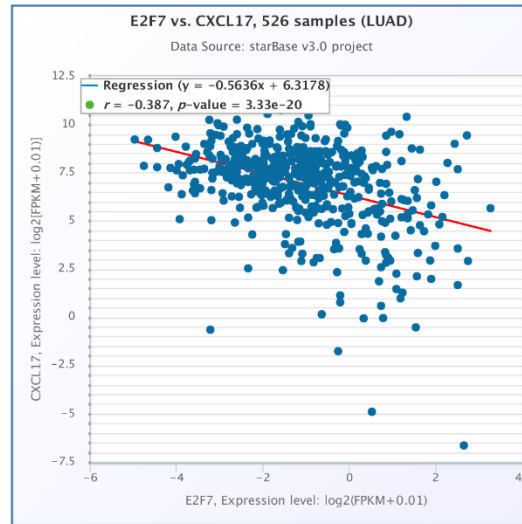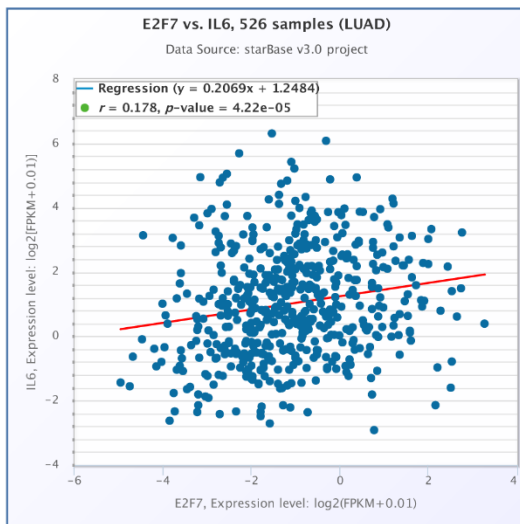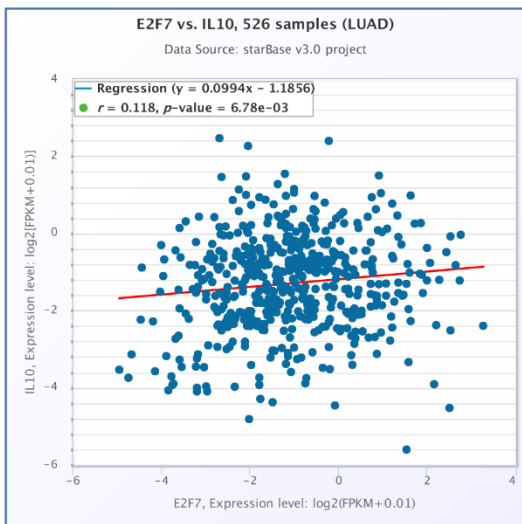

**Supplementary Table1 - The targets of E2Fs.**

| # TF | Target | Type       | Reference                                    |
|------|--------|------------|----------------------------------------------|
| E2F1 | ABCB1  | Activation | 23542036                                     |
| E2F1 | APAF1  | Activation | 12149244;12766778;17600109                   |
| E2F1 | APAF1  | Unknown    | 15972851                                     |
| E2F1 | AR     | Activation | 21099103                                     |
| E2F1 | AR     | Unknown    | 22508987                                     |
| E2F1 | ASF1B  | Activation | 17328667                                     |
| E2F1 | ATAD2  | Unknown    | 22771493                                     |
| E2F1 | ATG5   | Activation | 18408756                                     |
| E2F1 | ATM    | Activation | 12527885;22832221                            |
| E2F1 | ATM    | Unknown    | 23993922                                     |
| E2F1 | AURKA  | Activation | 20300951                                     |
| E2F1 | AURKB  | Unknown    | 15033491                                     |
| E2F1 | BBC3   | Activation | 17263886                                     |
| E2F1 | BCL2   | Activation | 11559537;12679318                            |
| E2F1 | BIRC5  | Activation | 17848598;19102934                            |
| E2F1 | BIRC5  | Repression | 19102934                                     |
| E2F1 | BIRC5  | Unknown    | 23449974                                     |
| E2F1 | BMI1   | Unknown    | 17360938                                     |
| E2F1 | BRCA1  | Repression | 20068145                                     |
| E2F1 | BRCA1  | Unknown    | 18660752;19466541;23285190                   |
| E2F1 | CASP7  | Activation | 12766778                                     |
| E2F1 | CCL3   | Unknown    | 17707233                                     |
| E2F1 | CCNB1  | Unknown    | 22508987                                     |
| E2F1 | CCND1  | Activation | 20220142;20655656;8618861                    |
| E2F1 | CCND1  | Unknown    | 19876926;22768064;8137237;9584162            |
| E2F1 | CCNE1  | Activation | 14618416;20220142;8618861                    |
| E2F1 | CD2AP  | Activation | 22880102                                     |
| E2F1 | CDAN1  | Unknown    | 19336738                                     |
| E2F1 | CDC6   | Unknown    | 18541154                                     |
| E2F1 | CDCA7  | Activation | 16580749                                     |
| E2F1 | CDK1   | Activation | 14618416                                     |
| E2F1 | CDKN1A | Activation | 10030670                                     |
| E2F1 | CDKN1A | Unknown    | 16923815                                     |
| E2F1 | CDKN1C | Unknown    | 20106982                                     |
| E2F1 | CDKN2A | Activation | 11705881;12695664;12766778;15716352;22621932 |

|      |          |            |                                     |
|------|----------|------------|-------------------------------------|
| E2F1 | CHEK1    | Unknown    | 18660752                            |
| E2F1 | CHEK2    | Activation | 15024084                            |
| E2F1 | CREBBP   | Unknown    | 9238849                             |
| E2F1 | CTNNBIP1 | Activation | 21532622                            |
| E2F1 | CTSV     | Unknown    | 23542171                            |
| E2F1 | CUX1     | Unknown    | 18347061                            |
| E2F1 | DAPK2    | Activation | 18521079                            |
| E2F1 | DBF4     | Activation | 18503552                            |
| E2F1 | DDIT3    | Unknown    | 20971808                            |
| E2F1 | DHFR     | Activation | 14618416                            |
| E2F1 | DIRAS3   | Repression | 16158053;16638845;16757345;17230502 |
| E2F1 | DNMT1    | Repression | 24502362                            |
| E2F1 | DOK1     | Unknown    | 23028047                            |
| E2F1 | DRAM1    | Activation | 18408756                            |
| E2F1 | DROSHA   | Activation | 24909689                            |
| E2F1 | DUSP1    | Activation | 17638884                            |
| E2F1 | E2F1     | Unknown    | 7958836                             |
| E2F1 | E2F6     | Activation | 16107498                            |
| E2F1 | ECT2     | Unknown    | 21886810                            |
| E2F1 | ERCC1    | Activation | 22159227                            |
| E2F1 | ERCC5    | Activation | 17893230                            |
| E2F1 | ERICD    | Repression | 24168400                            |
| E2F1 | ETV4     | Activation | 18687701                            |
| E2F1 | FANCA    | Activation | 18438432                            |
| E2F1 | FGFR1    | Activation | 19303924                            |
| E2F1 | FHIT     | Repression | 15044096                            |
| E2F1 | FLT1     | Unknown    | 20516113                            |
| E2F1 | FMN2     | Unknown    | 23839046                            |
| E2F1 | FOXM1    | Activation | 21518729                            |
| E2F1 | FSHR     | Unknown    | 11883315                            |
| E2F1 | FZD1     | Activation | 23806799                            |
| E2F1 | FZD1     | Unknown    | 20051274                            |
| E2F1 | GINS3    | Unknown    | 17127213                            |
| E2F1 | H19      | Activation | 15985428                            |
| E2F1 | HIC1     | Activation | 19491197                            |
| E2F1 | HMGA1    | Activation | 22389255                            |
| E2F1 | HSPA5    | Repression | 18840615                            |

|      |          |            |                   |
|------|----------|------------|-------------------|
| E2F1 | IL1B     | Unknown    | 17707233          |
| E2F1 | IL23A    | Unknown    | 17707233          |
| E2F1 | IRF3     | Repression | 21225257;22464952 |
| E2F1 | ISYNA1   | Activation | 15464731          |
| E2F1 | KDR      | Unknown    | 20516113          |
| E2F1 | KIF2C    | Activation | 23610368          |
| E2F1 | KIF2C    | Repression | 18440323          |
| E2F1 | KIR3DL1  | Activation | 18358829          |
| E2F1 | LRBA     | Activation | 15064745          |
| E2F1 | MAP1LC3A | Activation | 18408756          |
| E2F1 | MAP3K5   | Activation | 16476732;17287612 |
| E2F1 | MAP3K5   | Unknown    | 16512785;19610065 |
| E2F1 | MAPK8    | Unknown    | 20800677          |
| E2F1 | MCL1     | Repression | 11705881          |
| E2F1 | MCM5     | Unknown    | 17210690          |
| E2F1 | MCM8     | Unknown    | 16325355          |
| E2F1 | MCPH1    | Activation | 22136275          |
| E2F1 | MDM2     | Repression | 20837136          |
| E2F1 | MEFV     | Activation | 20805247          |
| E2F1 | MIR202   | Unknown    | 24337320          |
| E2F1 | MT1G     | Activation | 15735762          |
| E2F1 | MUC4     | Activation | 22537161          |
| E2F1 | MYB      | Unknown    | 8137237           |
| E2F1 | MYBL2    | Activation | 14618416;16299810 |
| E2F1 | MYC      | Activation | 11705881          |
| E2F1 | MYCN     | Activation | 14645238          |
| E2F1 | MYH10    | Unknown    | 8931991           |
| E2F1 | NELL2    | Unknown    | 23829315          |
| E2F1 | NOX4     | Activation | 18554521          |
| E2F1 | NPAT     | Activation | 12665581          |
| E2F1 | NRIP1    | Activation | 22629304          |
| E2F1 | PCNA     | Activation | 14618416          |
| E2F1 | PCSK6    | Activation | 17825503          |
| E2F1 | PDK4     | Repression | 21625432          |
| E2F1 | PEG10    | Unknown    | 18625225          |
| E2F1 | PIN1     | Unknown    | 20376080          |
| E2F1 | PLK1     | Activation | 24076372          |

|      |          |            |                                     |
|------|----------|------------|-------------------------------------|
| E2F1 | PNRC2    | Repression | 16181749                            |
| E2F1 | PPARG    | Activation | 12110166                            |
| E2F1 | PPARG    | Unknown    | 20971808                            |
| E2F1 | PPP1R13B | Activation | 15706352;21479363                   |
| E2F1 | PTPRO    | Unknown    | 18644370                            |
| E2F1 | RACGAP1  | Unknown    | 21886810                            |
| E2F1 | RAD51    | Unknown    | 23285190                            |
| E2F1 | RASGEF1B | Activation | 18396012                            |
| E2F1 | RASGRP1  | Activation | 18396012                            |
| E2F1 | RB1      | Activation | 8264596                             |
| E2F1 | RBM38    | Activation | 22798430                            |
| E2F1 | RNF2     | Unknown    | 17873902                            |
| E2F1 | RPA2     | Unknown    | 11313881                            |
| E2F1 | RRM1     | Activation | 14618416                            |
| E2F1 | RRM2     | Activation | 19416980                            |
| E2F1 | RRP1B    | Unknown    | 20040599                            |
| E2F1 | SERPINB5 | Activation | 20197383                            |
| E2F1 | SERPINE1 | Repression | 11402043;11559366                   |
| E2F1 | SIVA1    | Activation | 15105421                            |
| E2F1 | SIVA1    | Activation | 15105421                            |
| E2F1 | SKP2     | Activation | 23352642                            |
| E2F1 | SKP2     | Unknown    | 17483325;20424123;23348237;24574749 |
| E2F1 | TERT     | Activation | 21411498;22207128                   |
| E2F1 | TERT     | Repression | 21411498;22207128                   |
| E2F1 | THBS1    | Activation | 20976175                            |
| E2F1 | TLR3     | Repression | 22310660                            |
| E2F1 | TNF      | Unknown    | 17707233                            |
| E2F1 | TNFSF11  | Activation | 18381203                            |
| E2F1 | TOP2A    | Activation | 11313881                            |
| E2F1 | TP53     | Activation | 15706352                            |
| E2F1 | TP53     | Repression | 8557038                             |
| E2F1 | TP53     | Unknown    | 12625370;21441950;22241525          |
| E2F1 | TP53BP2  | Activation | 15706352                            |
| E2F1 | TP53BP2  | Unknown    | 19610065                            |
| E2F1 | TP53INP1 | Activation | 15706352                            |
| E2F1 | TP73     | Activation | 11115495;12766778;17980704          |
| E2F1 | TP73     | Unknown    | 11988839;19188449                   |

|      |        |            |                                     |
|------|--------|------------|-------------------------------------|
| E2F1 | TYMS   | Activation | 14618416;9748140                    |
| E2F1 | TYMS   | Unknown    | 10914714;14679120                   |
| E2F1 | UHRF1  | Activation | 12838312;15361834                   |
| E2F1 | UHRF1  | Unknown    | 23023523                            |
| E2F1 | ULK1   | Activation | 18408756                            |
| E2F1 | VEGFA  | Repression | 20639906                            |
| E2F1 | WWOX   | Repression | 15044096                            |
| E2F1 | XRCC1  | Activation | 19031698                            |
| E2F1 | ZNF350 | Unknown    | 22768064                            |
| E2F2 | CUX1   | Unknown    | 18347061                            |
| E2F2 | MAP3K5 | Unknown    | 16512785                            |
| E2F3 | AURKA  | Activation | 18776222                            |
| E2F3 | CCNA2  | Unknown    | 16909110                            |
| E2F3 | CCNB1  | Unknown    | 17098936                            |
| E2F3 | CDC6   | Unknown    | 18541154                            |
| E2F3 | CDK1   | Unknown    | 16909110                            |
| E2F3 | CDKN1A | Activation | 10030670                            |
| E2F3 | CUX1   | Unknown    | 18347061                            |
| E2F3 | ERICD  | Repression | 24168400                            |
| E2F3 | MAP3K5 | Unknown    | 16512785                            |
| E2F3 | MAPK8  | Unknown    | 20800677                            |
| E2F3 | PLK1   | Unknown    | 16909110                            |
| E2F3 | TFE3   | Unknown    | 12748276                            |
| E2F3 | VEGFA  | Unknown    | 21372519                            |
| E2F4 | AR     | Unknown    | 22508987                            |
| E2F4 | AURKB  | Unknown    | 15033491                            |
| E2F4 | BIRC5  | Unknown    | 18504435                            |
| E2F4 | BRCA1  | Activation | 20818429                            |
| E2F4 | BRCA1  | Repression | 17106239;20133863;21701264;23108140 |
| E2F4 | BRCA1  | Unknown    | 17001309                            |
| E2F4 | CCNB1  | Unknown    | 22508987                            |
| E2F4 | CCND1  | Unknown    | 9584162                             |
| E2F4 | CDK2   | Unknown    | 22447046                            |
| E2F4 | CUX1   | Unknown    | 18347061                            |
| E2F4 | DIRAS3 | Repression | 16158053;16638845;16757345;17230502 |
| E2F4 | HCFC1  | Activation | 14532282                            |
| E2F4 | PCLAF  | Repression | 23593430                            |



|      |        |            |                   |
|------|--------|------------|-------------------|
| E2F4 | LIN54  | Unknown    | 19725879          |
| E2F4 | LTBP4  | Unknown    | 23741501          |
| E2F4 | MAP3K5 | Unknown    | 16512785          |
| E2F4 | MCM10  | Repression | 15195143          |
| E2F4 | MYC    | Unknown    | 17132729          |
| E2F4 | PEG10  | Unknown    | 18625225          |
| E2F4 | PLK1   | Repression | 17981789          |
| E2F4 | PLK4   | Unknown    | 24071582          |
| E2F4 | PPARG  | Repression | 12110166          |
| E2F4 | RAD51  | Repression | 20133863;21701264 |
| E2F4 | RAD51  | Unknown    | 17001309          |
| E2F4 | TOPBP1 | Repression | 15195143          |
| E2F4 | TTK    | Repression | 17981789          |
| E2F5 | FSHR   | Unknown    | 11883315          |
| E2F5 | LOXL2  | Unknown    | 20012301          |
| E2F5 | MYC    | Unknown    | 17132729          |
| E2F6 | APAF1  | Repression | 17600109          |
| E2F6 | BRCA1  | Unknown    | 19466541          |
| E2F6 | BRD7   | Unknown    | 16792505          |
| E2F6 | CYC1   | Unknown    | 10998368          |
| E2F6 | E2F1   | Repression | 18562691          |
| E2F6 | IL13   | Unknown    | 22981205          |
| E2F6 | PCLAF  | Repression | 23593430          |
| E2F7 | E2F1   | Repression | 18202719          |
